# Supplementary material for: Factors Associated with Dietary Habit Changes in Korean Stomach Cancer Survivors after Cancer Treatment
Source: MDPI journal article supplement (doi:10.3390/nu15143268), 2023-07-24
Supplement: s1 [file s1]

## Supplementary Online Content

### Supplementary materials

Supplementary Table S1. Questionnaire of dietary habit change after cancer diagnosis

Supplementary Table S2. Dietary change after cancer diagnosis according to the subtype of surgical treatment: 608 Korean gastric cancer survivors

Supplementary Table S3. Dietary habit change after cancer diagnosis stratified by sex and age at the cancer diagnosis

Supplementary Table S4. Dietary habit change after cancer diagnosis stratified by sex and lapse after cancer diagnosis

Supplementary Table S5. Summary table of findings

Supplementary Figure S1. Distribution of healthier dietary change score according to the age at the stomach cancer diagnosis

This supplementary material has been provided by the authors to give readers additional information about their work.

**Supplementary Table S1.** Questionnaire to measure dietary pattern change of cancer survivors after cancer treatment

|                                                                                                                              |                  |                     |                 |                     |                  |
|------------------------------------------------------------------------------------------------------------------------------|------------------|---------------------|-----------------|---------------------|------------------|
| 1. Were there any change in the total amount of food intake, after you had finished cancer treatment?                        |                  |                     |                 |                     |                  |
|                                                                                                                              | ①Decreased a lot | ②Decreased somewhat | ③Did not change | ④Increased somewhat | ⑤Increased a lot |
| 2. Were there any change in the frequency of intake of each food item listed below, after you had finished cancer treatment? |                  |                     |                 |                     |                  |
| 1) Red meat                                                                                                                  | ①Decreased a lot | ②Decreased somewhat | ③Did not change | ④Increased somewhat | ⑤Increased a lot |
| 2) Poultry                                                                                                                   | ①Decreased a lot | ②Decreased somewhat | ③Did not change | ④Increased somewhat | ⑤Increased a lot |
| 3) Processed meat                                                                                                            | ①Decreased a lot | ②Decreased somewhat | ③Did not change | ④Increased somewhat | ⑤Increased a lot |
| 4) Fish                                                                                                                      | ①Decreased a lot | ②Decreased somewhat | ③Did not change | ④Increased somewhat | ⑤Increased a lot |
| 5) Vegetable                                                                                                                 | ①Decreased a lot | ②Decreased somewhat | ③Did not change | ④Increased somewhat | ⑤Increased a lot |
| 6) Fruit                                                                                                                     | ①Decreased a lot | ②Decreased somewhat | ③Did not change | ④Increased somewhat | ⑤Increased a lot |
| 7) Legume                                                                                                                    | ①Decreased a lot | ②Decreased somewhat | ③Did not change | ④Increased somewhat | ⑤Increased a lot |
| 8) Dairy product                                                                                                             | ①Decreased a lot | ②Decreased somewhat | ③Did not change | ④Increased somewhat | ⑤Increased a lot |
| 9) Grains                                                                                                                    | ①Decreased a lot | ②Decreased somewhat | ③Did not change | ④Increased somewhat | ⑤Increased a lot |
| 10) Salt                                                                                                                     | ①Decreased a lot | ②Decreased somewhat | ③Did not change | ④Increased somewhat | ⑤Increased a lot |
| 11) Burnt food                                                                                                               | ①Decreased a lot | ②Decreased somewhat | ③Did not change | ④Increased somewhat | ⑤Increased a lot |

**Supplementary Table S2.** Dietary change after cancer diagnosis according to the subtype of surgical treatment: 608 Korean gastric cancer survivors

| Dietary component | Total gastrectomy<br>(n=142) |                         | Biloth-1 subtotal gastrectomy<br>(n=328) |                         | Biloth-2 subtotal gastrectomy<br>(n=75) |                         | Pylorus preserving gastrectomy<br>(n=63) |                         | <i>p</i> for difference |
|-------------------|------------------------------|-------------------------|------------------------------------------|-------------------------|-----------------------------------------|-------------------------|------------------------------------------|-------------------------|-------------------------|
|                   | Decreased                    | Sustained/<br>Increased | Decreased                                | Sustained/<br>Increased | Decreased                               | Sustained/<br>Increased | Decreased                                | Sustained/<br>Increased |                         |
| Total food        | 105 (73.9)                   | 37 (26.1)               | 212 (64.6)                               | 116 (35.4)              | 53 (70.7)                               | 22 (29.3)               | 50 (79.4)                                | 13 (20.6)               | 0.050                   |
| Red meat          | 81 (57.0)                    | 61 (43.0)               | 187 (57.0)                               | 141 (43.0)              | 42 (56.0)                               | 33 (44.0)               | 32 (50.8)                                | 31 (49.2)               | 0.831                   |
| Poultry           | 67 (47.2)                    | 75 (52.8)               | 168 (51.2)                               | 160 (48.8)              | 35 (46.7)                               | 40 (53.3)               | 32 (50.8)                                | 31 (49.2)               | 0.809                   |
| Processed meat    | 64 (45.1)                    | 78 (54.9)               | 152 (46.3)                               | 176 (53.7)              | 28 (37.3)                               | 47 (62.7)               | 21 (33.3)                                | 42 (66.7)               | 0.170                   |
| Fish              | 27 (19.0)                    | 115 (81.0)              | 56 (17.1)                                | 272 (82.9)              | 12 (16.0)                               | 63 (84.0)               | 17 (27.0)                                | 46 (73.0)               | 0.284                   |
| Vegetable         | 11 (7.7)                     | 131 (92.3)              | 29 (8.8)                                 | 299 (91.2)              | 5 (6.7)                                 | 70 (93.3)               | 9 (14.3)                                 | 54 (85.7)               | 0.399                   |
| Fruit             | 13 (9.2)                     | 129 (90.8)              | 31 (9.5)                                 | 297 (90.5)              | 5 (6.7)                                 | 70 (93.3)               | 6 (9.5)                                  | 57 (90.5)               | 0.896                   |
| Legume            | 12 (8.5)                     | 130 (91.5)              | 20 (6.1)                                 | 308 (93.9)              | 5 (6.7)                                 | 70 (93.3)               | 7 (11.1)                                 | 56 (88.9)               | 0.495                   |
| Dairy product     | 38 (26.8)                    | 104 (73.2)              | 86 (26.2)                                | 242 (73.8)              | 17 (22.7)                               | 58 (77.3)               | 16 (25.4)                                | 47 (74.6)               | 0.921                   |
| Grains            | 21 (14.8)                    | 121 (85.2)              | 42 (12.8)                                | 286 (87.2)              | 5 (6.7)                                 | 70 (93.3)               | 11 (17.5)                                | 52 (82.5)               | 0.242                   |
| Salt              | 98 (69.0)                    | 44 (31.0)               | 225 (68.6)                               | 103 (31.4)              | 55 (73.3)                               | 20 (26.7)               | 45 (71.4)                                | 18 (28.6)               | 0.856                   |
| Burnt food        | 83 (58.5)                    | 59 (41.5)               | 180 (54.9)                               | 148 (45.1)              | 37 (49.3)                               | 38 (50.7)               | 33 (52.4)                                | 30 (47.6)               | 0.611                   |

Data are presented as number (%). *p* for difference were estimated between subtype of surgical treatment

**Supplementary Table S3.** Dietary habit change after cancer diagnosis stratified by sex and age at the cancer diagnosis

|                   | Age at diagnosis       | Dietary change       | Total food | Red meat   | Poultry    | Processed meat   | Fish       | Vegetable    | Fruit        | Legume     | Dairy product | Grains     | Salt         | Burnt food       |
|-------------------|------------------------|----------------------|------------|------------|------------|------------------|------------|--------------|--------------|------------|---------------|------------|--------------|------------------|
| Total<br>(n=624)  | < 45 years<br>(n=138)  | Sustained/ Increased | 38 (27.5)  | 69 (50.0)  | 78 (56.5)  | 53 (38.4)        | 115 (83.3) | 135 (97.8)   | 134 (97.1)   | 134 (97.1) | 100 (72.5)    | 119 (83.2) | 35 (25.4)    | 42 (30.4)        |
|                   |                        | Decreased            | 100 (72.5) | 69 (50.0)  | 60 (43.5)  | 85 (61.6)        | 23 (16.7)  | 3 (2.2)      | 4 (2.9)      | 4 (2.9)    | 38 (27.5)     | 19 (13.8)  | 103 (74.6)   | 96 (69.6)        |
|                   | 45-54 years<br>(n=231) | Sustained/ Increased | 74 (32.0)  | 100 (43.3) | 120 (51.9) | 123 (53.2)       | 187 (81.0) | 211 (91.3)   | 213 (92.2)   | 215 (93.1) | 165 (71.4)    | 204 (88.3) | 63 (27.3)    | 88 (38.1)        |
|                   |                        | Decreased            | 157(68.0)  | 131 (56.7) | 111 (48.1) | 108 (46.8)       | 44 (19.0)  | 20 (8.7)     | 18 (7.8)     | 16 (6.9)   | 66 (28.6)     | 27 (11.7)  | 168 (72.7)   | 143 (61.9)       |
|                   | ≥ 55 years<br>(n=255)  | Sustained/ Increased | 86 (33.7)  | 108 (42.4) | 119 (46.7) | 180 (70.6)       | 208 (81.6) | 223 (87.5)   | 221 (86.7)   | 231 (90.6) | 202 (79.2)    | 220 (86.3) | 94 (36.9)    | 155 (60.8)       |
|                   |                        | Decreased            | 169 (66.3) | 147 (57.6) | 136 (53.3) | 75 (29.4)        | 47 (18.4)  | 32 (12.5)    | 34 (13.3)    | 24 (9.4)   | 53 (20.8)     | 35 (13.7)  | 161 (63.1)   | 100 (39.2)       |
|                   | P for difference       |                      | 0.450      | 0.316      | 0.159      | <b>&lt;0.001</b> | 0.846      | <b>0.002</b> | <b>0.002</b> | 0.055      | 0.109         | 0.762      | <b>0.022</b> | <b>&lt;0.001</b> |
|                   |                        |                      |            |            |            |                  |            |              |              |            |               |            |              |                  |
| Male<br>(n=362)   | < 45 years<br>(n=60)   | Sustained/ Increased | 12 (20.0)  | 26 (43.3)  | 31 (51.7)  | 25 (41.7)        | 50 (83.3)  | 59 (98.3)    | 58 (96.7)    | 59 (98.3)  | 45 (75.0)     | 51 (85.0)  | 13 (21.7)    | 9 (15.0)         |
|                   |                        | Decreased            | 48 (80.0)  | 34 (56.7)  | 29 (48.3)  | 35 (58.3)        | 10 (16.7)  | 1 (1.7)      | 2 (3.3)      | 1 (1.7)    | 15 (25.0)     | 9 (15.0)   | 47 (78.3)    | 51 (85.0)        |
|                   | 45-54 years<br>(n=143) | Sustained/ Increased | 48 (33.6)  | 54 (37.8)  | 66 (46.2)  | 71 (49.7)        | 116 (81.1) | 130 (90.9)   | 132 (92.3)   | 135 (94.4) | 102 (71.3)    | 126 (88.1) | 41 (28.7)    | 47 (32.9)        |
|                   |                        | Decreased            | 95( 66.4)  | 89 (62.2)  | 77 (53.8)  | 72 (50.3)        | 27 (18.9)  | 13 (9.1)     | 11 (7.7)     | 8 (5.6)    | 41 (28.7)     | 17 (11.9)  | 102 (71.3)   | 96 (67.1)        |
|                   | ≥ 55 years<br>(n=159)  | Sustained/ Increased | 49 (30.8)  | 64 (40.3)  | 74 (46.5)  | 106 (66.7)       | 131 (82.4) | 140 (88.1)   | 139 (87.4)   | 146 (91.8) | 130 (81.8)    | 138 (86.8) | 61 (38.4)    | 88 (55.3)        |
|                   |                        | Decreased            | 110 (69.2) | 95 (59.7)  | 85 (53.5)  | 53 (33.3)        | 28 (17.6)  | 19 (11.9)    | 20 (12.6)    | 13 (8.2)   | 29 (18.2)     | 21 (13.2)  | 98 (61.6)    | 71 (44.7)        |
|                   | P for difference       |                      | 0.152      | 0.750      | 0.752      | <b>0.001</b>     | 0.921      | 0.062        | 0.079        | 0.189      | 0.098         | 0.829      | <b>0.036</b> | <b>&lt;0.001</b> |
|                   |                        |                      |            |            |            |                  |            |              |              |            |               |            |              |                  |
| Female<br>(n=262) | < 45 years<br>(n=78)   | Sustained/ Increased | 26 (33.3)  | 43 (55.1)  | 47 (60.3)  | 28 (35.9)        | 65 (83.3)  | 76 (97.4)    | 76 (97.4)    | 75 (96.2)  | 55 (70.5)     | 68 (87.2)  | 22 (28.2)    | 33 (42.3)        |
|                   |                        | Decreased            | 52 (66.7)  | 35 (44.9)  | 31 (39.7)  | 50 (64.1)        | 13 (16.7)  | 2 (2.6)      | 2 (2.6)      | 3 (3.8)    | 23 (29.5)     | 10 (12.8)  | 56 (71.8)    | 45 (57.7)        |
|                   | 45-54 years<br>(n=88)  | Sustained/ Increased | 26 (29.5)  | 46 (52.3)  | 54 (61.4)  | 52 (59.1)        | 71 (80.7)  | 81 (92.0)    | 81 (92.0)    | 80 (90.9)  | 63 (71.6)     | 78 (88.6)  | 22 (25.0)    | 41 (46.6)        |
|                   |                        | Decreased            | 62 (70.5)  | 42 (47.7)  | 34 (38.6)  | 36 (40.9)        | 17 (19.3)  | 7 (8.0)      | 7 (8.0)      | 8 (9.1)    | 25 (28.4)     | 10 (11.4)  | 66 (75.0)    | 47 (53.4)        |
|                   | ≥ 55 years<br>(n=96)   | Sustained/ Increased | 37 (38.5)  | 44 (45.8)  | 45 (46.9)  | 74 (77.1)        | 77 (80.2)  | 83 (86.5)    | 82 (85.4)    | 85 (88.5)  | 72 (75.0)     | 82 (85.4)  | 33 (34.4)    | 67 (69.8)        |
|                   |                        | Decreased            | 59 (61.5)  | 52 (54.2)  | 51 (53.1)  | 22 (22.9)        | 19 (19.8)  | 13 (13.5)    | 14 (14.6)    | 11 (11.5)  | 24 (25.0)     | 14 (14.6)  | 63 (65.6)    | 29 (30.2)        |
|                   | P for difference       |                      | 0.432      | 0.447      | 0.089      | <b>&lt;0.001</b> | 0.857      | <b>0.034</b> | <b>0.019</b> | 0.190      | 0.782         | 0.809      | 0.364        | <b>&lt;0.001</b> |
|                   |                        |                      |            |            |            |                  |            |              |              |            |               |            |              |                  |

Data are presented as number (%). Bold values denote statistical significant at the p&lt;0.05 level

**Supplementary Table S4.** Dietary habit change after cancer diagnosis stratified by sex and lapse after cancer diagnosis

|                       | Lapse after diagnosis | Dietary change       | Total food           | Red meat   | Poultry    | Processed meat | Fish       | Vegetable    | Fruit        | Legume       | Dairy product | Grains       | Salt         | Burnt food |
|-----------------------|-----------------------|----------------------|----------------------|------------|------------|----------------|------------|--------------|--------------|--------------|---------------|--------------|--------------|------------|
| Total<br>(n=624)      | < 5 years<br>(n=166)  | Sustained/ Increased | 45 (27.1)            | 70 (42.2)  | 79 (47.6)  | 94 (56.6)      | 127 (76.5) | 142 (85.5)   | 143 (86.1)   | 146 (88.0)   | 124 (74.7)    | 137 (82.5)   | 33 (19.9)    | 76 (45.8)  |
|                       |                       | Decreased            | 121 (72.9)           | 96 (57.8)  | 87 (52.4)  | 72 (43.4)      | 39 (23.5)  | 24 (14.5)    | 23 (13.9)    | 20 (12.0)    | 42 (25.3)     | 29 (17.5)    | 133 (80.1)   | 90 (54.2)  |
|                       | 5- 9 years<br>(n=395) | Sustained/ Increased | 131 (33.2)           | 178 (45.1) | 208 (52.7) | 223 (56.5)     | 329 (83.3) | 368 (93.2)   | 366 (92.7)   | 373 (94.4)   | 296 (74.9)    | 345 (87.3)   | 133 (33.7)   | 174 (44.1) |
|                       |                       | Decreased            | 264 (66.8)           | 217 (54.9) | 187 (47.3) | 172 (43.5)     | 66 (16.7)  | 27 (6.8)     | 29 (7.3)     | 22 (5.6)     | 99 (25.1)     | 50 (12.7)    | 262 (66.3)   | 221 (55.9) |
|                       | ≥ 10 years<br>(n=63)  | Sustained/ Increased | 22 (34.9)            | 29 (46.0)  | 30 (47.6)  | 39 (61.9)      | 54 (85.7)  | 59 (93.7)    | 59 (93.7)    | 61 (96.8)    | 47 (74.6)     | 61 (96.8)    | 26 (41.3)    | 35 (55.6)  |
|                       |                       | Decreased            | 41 (65.1)            | 34 (54.0)  | 33 (52.4)  | 24 (38.1)      | 9 (14.3)   | 4 (6.3)      | 4 (6.3)      | 2 (3.2)      | 16 (25.4)     | 2 (3.2)      | 37 (58.7)    | 28 (44.4)  |
|                       | P for difference      |                      | 0.315                | 0.789      | 0.476      | 0.714          | 0.114      | <b>0.011</b> | <b>0.036</b> | <b>0.011</b> | 0.997         | <b>0.015</b> | <b>0.001</b> | 0.235      |
|                       | Male<br>(n=362)       | < 5 years<br>(n=101) | Sustained/ Increased | 24 (23.8)  | 39 (38.6)  | 44 (43.6)      | 53 (52.5)  | 79 (78.2)    | 88 (87.1)    | 88 (87.1)    | 92 (91.1)     | 78 (77.2)    | 84 (83.2)    | 18 (17.8)  |
| Decreased             |                       |                      | 77 (76.2)            | 62 (61.4)  | 57 (56.4)  | 48 (47.5)      | 22 (21.8)  | 13 (12.9)    | 13 (12.9)    | 9 (8.9)      | 23 (22.8)     | 17 (16.8)    | 83 (82.2)    | 63 (62.4)  |
| 5- 9 years<br>(n=223) |                       | Sustained/ Increased | 70 (31.4)            | 87 (39.0)  | 109 (48.9) | 126 (56.5)     | 185 (83.0) | 205 (91.9)   | 205 (91.9)   | 211 (94.6)   | 168 (75.3)    | 194 (87.0)   | 81 (36.3)    | 89 (39.9)  |
|                       |                       | Decreased            | 153 (68.6)           | 136 (61.0) | 114 (51.1) | 97 (43.5)      | 38 (17.0)  | 18 (8.1)     | 18 (8.1)     | 12 (5.4)     | 55 (24.7)     | 29 (13.0)    | 142 (63.7)   | 134 (60.1) |
| ≥ 10 years<br>(n=38)  |                       | Sustained/ Increased | 15 (39.5)            | 18 (47.4)  | 18 (47.4)  | 23 (60.5)      | 33 (86.8)  | 36 (94.7)    | 36 (94.7)    | 37 (97.4)    | 31 (81.6)     | 37 (97.4)    | 16 (42.1)    | 17 (44.7)  |
|                       |                       | Decreased            | 23 (60.5)            | 20 (52.6)  | 20 (52.6)  | 15 (39.5)      | 5 (13.2)   | 2 (5.3)      | 2 (5.3)      | 1 (2.6)      | 7 (18.4)      | 1 (2.6)      | 22 (57.9)    | 21 (55.3)  |
| P for difference      |                       | 0.158                | 0.599                | 0.674      | 0.657      | 0.422          | 0.260      | 0.260        | 0.301        | 0.690        | 0.085         | <b>0.001</b> | 0.746        |            |
| Female<br>(n=262)     |                       | < 5 years<br>(n=65)  | Sustained/ Increased | 21 (32.3)  | 31( 47.7)  | 35 (53.8)      | 41 (63.1)  | 48 (73.8)    | 54 (83.1)    | 55 (84.6)    | 54 (83.1)     | 46 (70.8)    | 53 (81.5)    | 15 (23.1)  |
|                       | Decreased             |                      | 44 (67.7)            | 34 (52.3)  | 30 (46.2)  | 24 (36.9)      | 17 (26.2)  | 11 (16.09)   | 10 (15.4)    | 11 (16.9)    | 19 (29.2)     | 12 (18.5)    | 50 (76.9)    | 27 (41.5)  |
|                       | 5- 9 years<br>(n=172) | Sustained/ Increased | 61 (35.5)            | 91 (52.9)  | 99 (57.69) | 97 (56.4)      | 144 (83.7) | 163 (94.8)   | 161 (93.6)   | 162 (94.2)   | 128 (74.4)    | 151 (87.8)   | 52 (30.2)    | 85 (49.4)  |
|                       |                       | Decreased            | 111 (64.5)           | 81 (47.1)  | 73 (42.4)  | 75 (43.6)      | 28 (16.3)  | 9 (5.2)      | 11 (6.4)     | 10 (5.8)     | 44 (25.6)     | 21 (12.2)    | 120 (69.8)   | 87 (50.6)  |
|                       | ≥ 10 years<br>(n=25)  | Sustained/ Increased | 7 (28.0)             | 11 (44.0)  | 12 (48.0)  | 16 (64.0)      | 21 (84.0)  | 23 (92.0)    | 23 (92.0)    | 24 (96.0)    | 16 (64.0)     | 24 (96.0)    | 10 (40.0)    | 18 (72.0)  |
|                       |                       | Decreased            | 18 (72.0)            | 14 (56.0)  | 13 (52.0)  | 9 (36.0)       | 4 (16.0)   | 2 (8.0)      | 2 (8.0)      | 1 (4.0)      | 9 (36.0)      | 1 (4.0)      | 15 (60.0)    | 7 (28.0)   |
|                       | P for difference      |                      | 0.723                | 0.601      | 0.628      | 0.554          | 0.206      | <b>0.015</b> | 0.092        | <b>0.016</b> | 0.516         | 0.165        | 0.264        | 0.073      |

Data are presented as number (%). Bold values denote statistical significant at the p<0.05 level

**Supplementary Table S5.** Summary table: Identified characteristics of stomach cancer survivors associated with healthier or unhealthier directional change of food intake

|                              |                                  | Direction   | Relevant food items                                           |
|------------------------------|----------------------------------|-------------|---------------------------------------------------------------|
| Sociodemographic factor      | Older age                        | Unhealthier | Poultry, processed meat, vegetable, fruit, legume, burnt food |
|                              | Female                           | Unhealthier | Burnt food                                                    |
|                              | Live with spouse                 | Unhealthier | Grains                                                        |
|                              | Higher education achievement     | Healthier   | Processed meat, vegetable, fruit, burnt food                  |
|                              |                                  | Unhealthier | Grains                                                        |
|                              | Higher household Income          | Healthier   | Vegetable, fruit, salt                                        |
| Lapse after cancer diagnosis | Longer                           | Unhealthier | Fish, grains, salt                                            |
| Preoperative body mass index | Higher                           | Healthier   | Red meat, processed meat, grains                              |
| Psychological factor         | Higher fear of cancer recurrence | Healthier   | Fish, fruit                                                   |
|                              | Depression                       | Healthier   | Red meat, processed meat, burnt food                          |
|                              | Anxiety                          | Healthier   | Grains                                                        |

Supplementary figure 1. Distribution of healthier dietary change score according to the age at the stomach cancer diagnosis

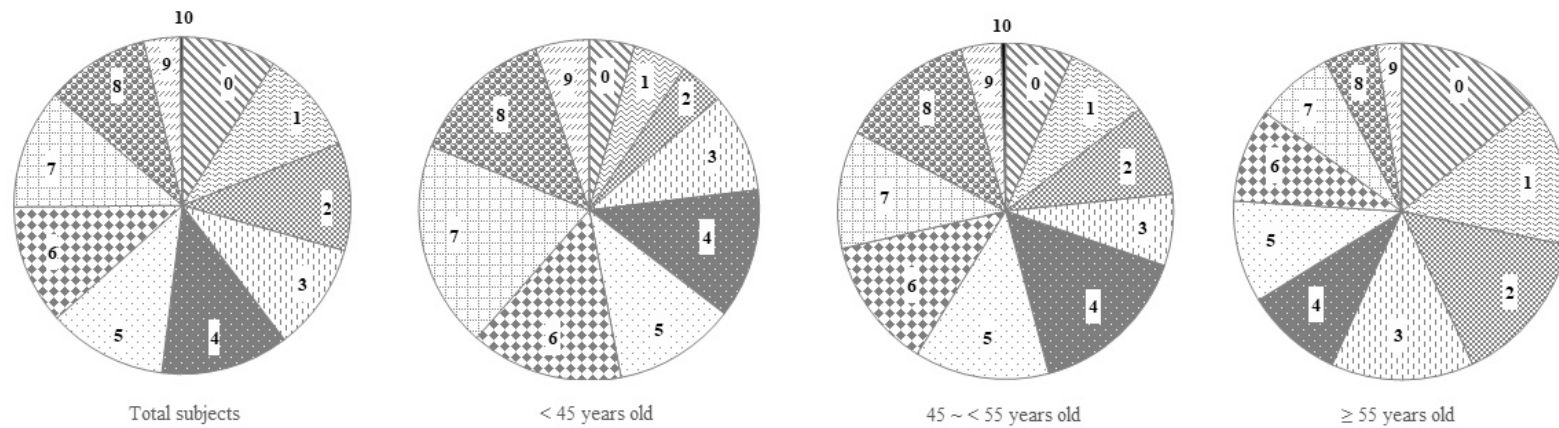

| Healthier dietary change score* |         | 0    | 1    | 2    | 3    | 4    | 5    | 6    | 7    | 8    | 9   | 10  | 11  | Mean | p-value† |
|---------------------------------|---------|------|------|------|------|------|------|------|------|------|-----|-----|-----|------|----------|
| Proportion (%)                  |         |      |      |      |      |      |      |      |      |      |     |     |     |      |          |
| Total Subjects                  | (n=624) | 9.1  | 9.9  | 10.3 | 10.3 | 12.3 | 11.4 | 11.5 | 11.5 | 9.9  | 3.5 | 0.2 | 0.0 | 4.3  | <0.001   |
| < 45 years old                  | (n=138) | 4.3  | 5.1  | 4.3  | 9.4  | 12.3 | 11.6 | 14.5 | 19.6 | 13.8 | 5.1 | 0.0 | 0.0 | 5.3  |          |
| 45 ~ < 55 years old             | (n=231) | 6.5  | 8.2  | 8.7  | 6.9  | 15.6 | 13.0 | 12.6 | 11.3 | 13.0 | 3.9 | 0.4 | 0.0 | 4.7  |          |
| ≥ 55 years old                  | (n=255) | 14.1 | 14.1 | 14.9 | 13.7 | 9.4  | 9.8  | 9.0  | 7.5  | 5.1  | 2.4 | 0.0 | 0.0 | 3.4  |          |

\*Healthier dietary change score was operationally defined as the number of dietary component in dietary habit changes toward healthier direction

†Assessed by Mantel-Haenszel chi-square test
